# Supplementary material for: Blockade of Vascular Endothelial Growth Factor Receptor 1 Prevents Inflammation and Vascular Leakage in Diabetic Retinopathy
Source: Hindawi journal article supplement (doi:10.1155/2015/605946), 2015-01-01

**Supplementary Table 1.** Primer sequence of cytokine genes.

| Gene   | Access No.  | Forward               | Reverse               | Length |
|--------|-------------|-----------------------|-----------------------|--------|
| Itb    | NM_008518.2 | tatcactgtcctggctgtgc  | tcctggaagcattggatctc  | 315    |
| casp1  | BC008152.1  | aaagaaacatgcgcacacag  | cctctttgccctcaggatct  | 266    |
| cxcl9  | BC003343.1  | tcctttgggcatcatcttc   | agtccggatctaggcaggtt  | 126    |
| cxcr2  | NM_009909.3 | gctgcctcactttctccag   | agggcatgccagagctataa  | 2919   |
| ccl8   | NM_021443.3 | acgctagccttactccaaa   | tctggaaaaccacagcttcc  | 111    |
| cxcl11 | NM_019494.1 | gctgctgagatgaacaggaa  | actttgtcgcagccgttact  | 126    |
| il1f6  | NM_019450.3 | tggcagctcagaaacaacat  | ggcatgggagcaaggaata   | 139    |
| ccl4   | NM_013652.2 | gccctctctcctcttgct    | gtctgcctcttttggtcagg  | 114    |
| cxcl10 | NM_021274.1 | aagtgtgccgtcattttct   | gtggcaatgatctcaacacg  | 126    |
| ccl20  | NM_016960.2 | cttgctttggcatgggtact  | aggagggtcacagccctttt  | 114    |
| il1f8  | AY071842.1  | ctttggaccaaggcaatgat  | ttccagtcaggaccatacc   | 107    |
| cxcr3  | NM_009910.2 | gcaagttcccaaccacaagt  | tctcgttttccccataatcg  | 1506   |
| cxcl15 | NM_011339.2 | tcctgctggctgtccttaac  | taattgggccaacagtagcc  | 129    |
| il1b   | NM_008361.3 | tgtaaagtcacacctttga   | tgctctcatcctggaaggctc | 201    |
| il13   | NM_008355.3 | cagctccctggttctctcac  | ggaatccagggtacacaga   | 104    |
| ccl6   | M58004.1    | aggctggcctcatacaagaa  | tcccctcctgctgataaaga  | 111    |
| ccr5   | D83648.1    | tcctagccagaggagggtgag | agccgcaattgtttcacat   | 2823   |
| il1a   | NM_010554.4 | gcaacgggaagattctgaag  | tgacaaacttctgcctgacg  | 173    |
| il10   | M37897.1    | tgctatgctgcctgctctta  | tcatttccgataaggcttgg  | 152    |
| cxcr5  | NM_007551.2 | catgggctccatcacatata  | gtgcctctccaggattacca  | 2514   |

**Supplementary Figure 1. Increased expression of VEGFR1 protein in Akita diabetic mouse retina.** (A & B) Western blots (WB) results. The anti-VEGFR1 antibody MF1 detected a protein band of approximately 180KDa in the retinas of 8~9-month-old (lane 2 in A & left lane 2 in B) and 5~6-month-old (left Lane 3 in B) Akita diabetic mice but did not (lane 1 in A) or weakly (left lane 1 in B) in the retinas of the non-diabetic control mice. For protein loading controls, the anti- $\beta$ -actin antibody was mixed with MF1 and probed the protein blots simultaneously (A) or it separately probed the striped protein blots (B). (C & D) IF results showed VEGFR1 protein localized in the blood vessels of the diabetic mouse retina (D) but was not detected in the non-diabetic control mouse retina (C). GCL: ganglion cell layer; IPL: inner plexiform layer; INL: inner nuclear layer; OPL: outer plexiform layer; ONL: outer plexiform layer. Scale bar: 50 $\mu$ m. (E & F) Quantification of WB (E) and IF (F) showed expression of VEGFR1 protein is up regulated in the retinas of Akita diabetic mice compared to non-diabetic control mice.

The results were averaged from four Akita diabetic mice and four non-diabetic control mice (n=4).

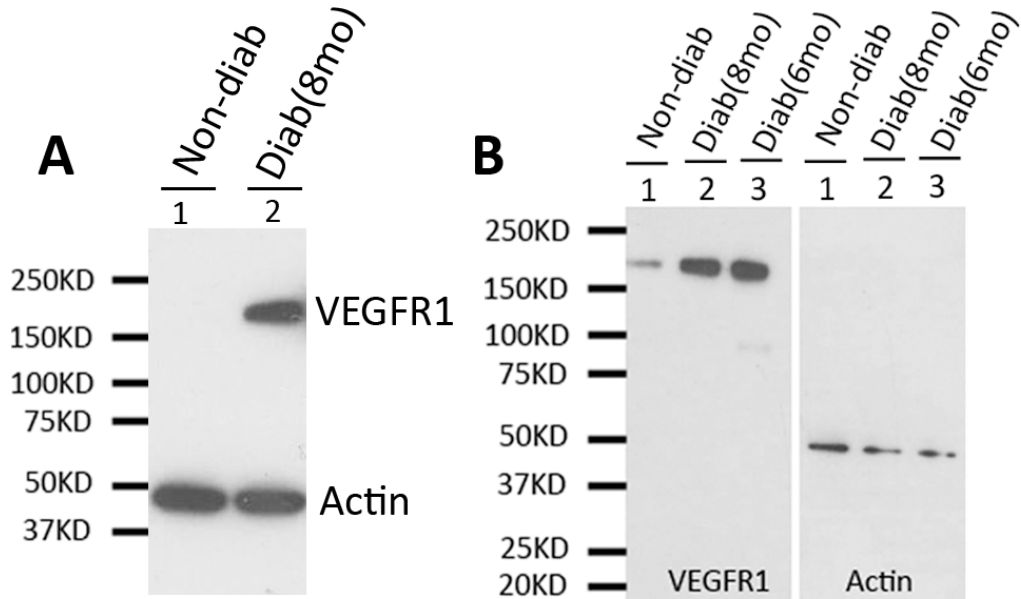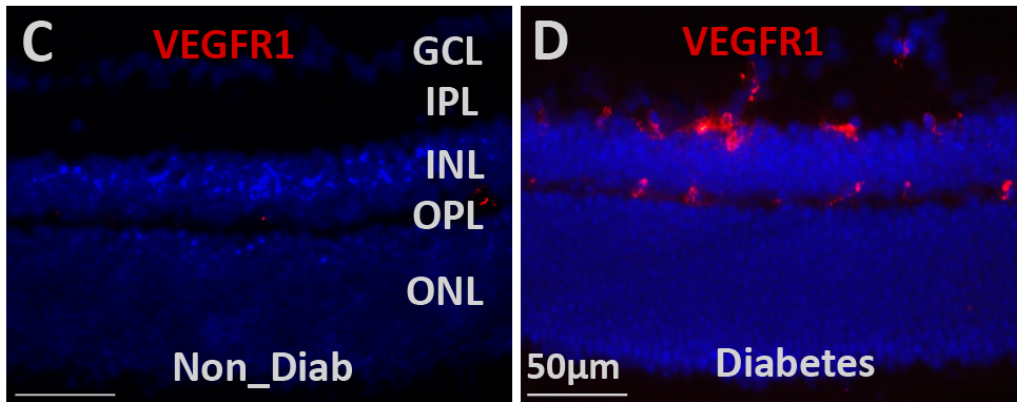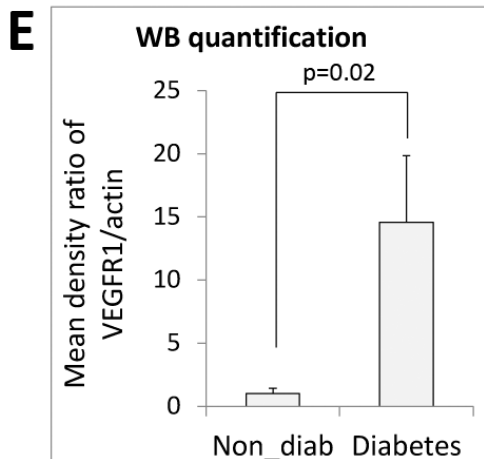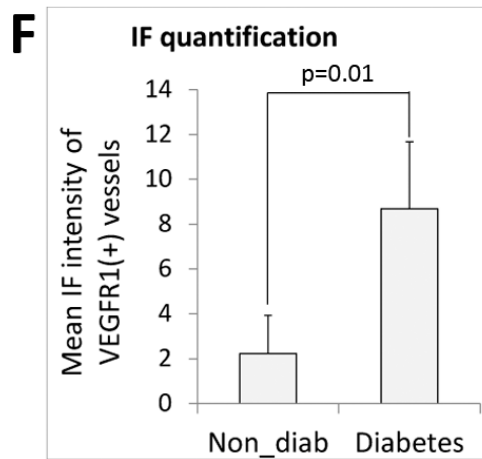

Supplement: f1 [file 605946.f1.pdf]
